# Supplementary material
Source: PubMed Central journal article supplement (PMC3390988)
Supplement: Supp_Data.pdf [file Supp_Data.pdf]

## Supplementary Data

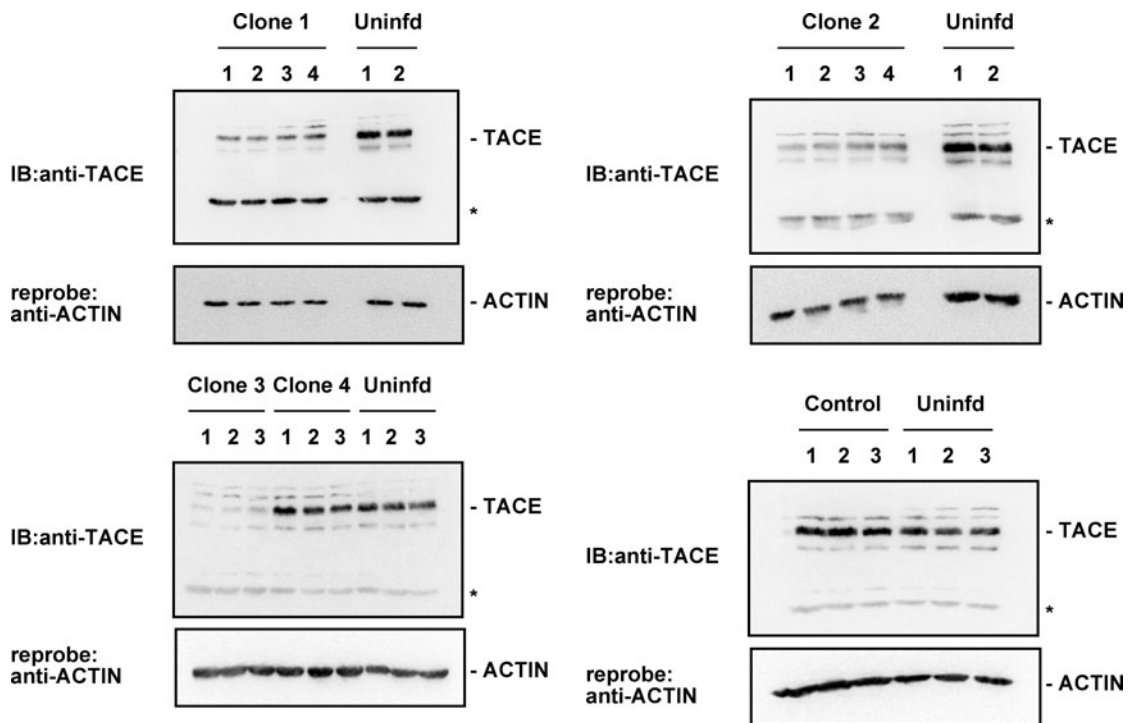

**SUPPLEMENTARY FIG. S1.** TACE expression silencing in Daudi cells via shRNA-mediated knockdown. Daudi cells were infected with a lentivirus containing an shRNA targeting the *TACE* gene or a control shRNA. Clones derived from a single infected cell were selected in puromycin. Lysates were immunoblotted with anti-TACE and compared to uninfected and nontargeting shRNA cells to assess the level of TACE silencing. Blots were stripped and re-probed with anti-actin. Clones 1–4 were generated from 4 different shRNAs targeting TACE. Asterisks identify artifact bands. TACE, TNF-alpha converting enzyme; Uninf, uninfected.
